# Supplementary material
Source: PubMed Central journal article supplement (PMC5173486)
Supplement: supp_4.4.E706_2016-0087-1-at.pdf [file supp_4.4.E706_2016-0087-1-at.pdf]

## Appendix 1 (as supplied by the authors): Supplementary material

### Supplementary Table 1: Results of sensitivity analyses

| Analysis                                                                                          | Pooled risk ratio<br>Median (95% credible interval) | 95% Prediction<br>interval | Between-study standard<br>deviation in log risk ratio<br>Median (95% credible<br>interval) |
|---------------------------------------------------------------------------------------------------|-----------------------------------------------------|----------------------------|--------------------------------------------------------------------------------------------|
| Results reported in the main text*                                                                | 0.25 (0.08, 0.47)                                   | (0.03, 1.38)               | 0.64 (0.06, 1.75)                                                                          |
| Alternative prior over variance I<br>(Standard Deviation** ~ Uniform (0,3))                       | 0.24 (0.07, 0.47)                                   | (0.02, 1.51)               | 0.65 (0.03, 2.15)                                                                          |
| Alternative prior over variance II<br>(Standard Deviation** ~ Cauchy (scale=25))                  | 0.24 (0.07, 0.48)                                   | (0.02, 1.77)               | 0.66 (0.06, 2.53)                                                                          |
| Including studies that did not report results of testing                                          | 0.28 (0.11, 0.52)                                   | (0.04, 1.36)               | 0.65 (0.07, 1.63)                                                                          |
| Excluding study by Gao et al.[1]                                                                  | 0.25 (0.06, 0.55)                                   | (0.02, 1.77)               | 0.79 (0.07, 1.88)                                                                          |
| Including only studies with a strict definition of diarrhea ( $\geq 3$ liquid stools in 24 hours) | 0.25 (0.05, 0.77)                                   | (0.01, 3.09)               | 1.01 (0.09, 1.93)                                                                          |

\* Between-study standard deviation in log risk ratio ~ U(0,2); \*\* Between study standard-deviation in log risk ratio

## Search strategy for PubMed database:

Articles for this report were identified using the following search strategy on Dec 2015:

((Probiotic\*[Title/Abstract] AND Lactobacill\*[Title/Abstract])) AND  
(Clostridium[Title/Abstract] OR difficile[Title/Abstract] OR antibiotic associated  
diarrhea[Title/Abstract])) AND Patients[Title/Abstract]

This search strategy returned 86 records on Dec 20, 2015. We applied different filters resulting in the following exclusions:

Non-English records: 8,

Animal studies: 2,

Pediatrics: 11,

Review: 21

Systematic reviews: 7,

Observational studies: 8,

Cost analysis: 2,

In vitro studies: 5,

Comment: 1,

HTA report: 1.

The total number of potentially relevant records (randomized controlled trials) remaining was 20 articles.

## WinBUGS program for Bayesian meta-analysis

```
model {  
  
  for (i in 1:k) {  
  
    TC1[i] ~ dbin(pc[i], N1c[i]) # pc=probability of AAD in control group  
    TT1[i] ~ dbin(pt[i], N1t[i]) # pt=probability of AAD in treatment group  
    TC2[i] ~ dbin(qc[i], N2c[i]) # qc=probability of CDAD+ among N2 AAD patients tested in control group  
    TT2[i] ~ dbin(qt[i], N2t[i]) # qt=probability of CDAD+ among N2 AAD patients tested in treatment group  
  
    qc[i] <- min(risk0[i] / pc[i], 1) # risk0 = adjusted risk of CDAD in control group  
    qt[i] <- min(risk1[i] / pt[i], 1) # risk1 = adjusted risk of CDAD in treatment group  
  
    log(risk1[i]) <- log(risk0[i]) + min(delta[i], -log(risk0[i]))  
    delta[i] ~ dnorm(delt, precision.tau)  
  
    rr.ind[i] <- exp(delta[i])  
    pc[i] ~ dunif(0, 1)  
    pt[i] ~ dunif(0, 1)  
    risk0[i] ~ dbeta(0.5, 0.5)  
  
  }  
  
  mu.new ~ dnorm(delt, precision.tau)  
  rr.new <- exp(mu.new) # predicted risk ratio in a future study  
  
  delt ~ dnorm(0, 0.0001) # prior on log(pooled risk ratio)  
  rr <- exp(delt) # pooled risk ratio  
  
  precision.tau <- 1/tau.squared  
  tau.squared <- tau*tau  
  tau ~ dunif(0, 2) # prior on between-study standard deviation  
  
  # probability predicted risk ratio is less than 1  
  prob <- step(1-rr.new)  
  
}  
  
list(k=10,  
     N1t=c(1493, 336, 117, 171, 216, 23, 44, 69, 69, 16),  
     N1c=c(1488, 167, 112, 84, 221, 17, 45, 66, 69, 18),  
     TT1=c(159, 54, 5, 37, 47, 4, 7, 7, 15, 5),  
     TC1=c(153, 41, 10, 37, 65, 6, 16, 19, 15, 2),  
     N2t=c(93, 54, 5, 37, 16, 3, 2, 7, 15, 5),  
     N2c=c(88, 41, 4, 37, 30, 4, 13, 19, 15, 2),  
     TT2=c(12, 6, 0, 9, 1, 0, 1, 0, 2, 0),  
     TC2=c(17, 8, 0, 20, 4, 1, 7, 9, 5, 0))
```

## R program for frequentist meta-analysis models

```
# Loading metafor library
library(metafor)

# Reading data
dat=list(k=10, nt=c(1493, 336, 117,171, 216, 23, 44, 69, 69, 16), nc=c(1488, 167, 112,84, 221, 17, 45, 53, 69, 18),rt=c(20.5, 6, 0,
9, 2.9, 0, 3.5, 0, 2, 0),rc=c(29.6,8, 0,20, 8.7, 1.5, 8.6, 9, 5, 0))

a<-escalc(ai=dat$rt,bi=dat$nt-dat$rt,ci=dat$rc,di=dat$nc-dat$rc,measure="RR")

# Dersimonian-Laird method
res.DL<-rma(yi,vi,dat=a,method="DL")

# Sidik-Jonkman method
res.SJ<-rma(yi,vi,dat=a,method="SJ")
```

| Author             | Randomization Technique | Allocation Concealment | Double-blinding (patient-caregiver) | Equal follow-up | Blind assessment | Final Rating |
|--------------------|-------------------------|------------------------|-------------------------------------|-----------------|------------------|--------------|
| Heimberger 1994[2] | N.R. ?                  | N.R. ?                 | Yes +                               | Yes +           | Unclear ?        | C            |
| Plummer 2004[3]    | N.R. ?                  | N.R. ?                 | Yes +                               | N.R. ?          | Unclear ?        | C            |
| Beausoleil 2007[4] | N.R. ?                  | N.R. ?                 | Yes +                               | Yes +           | Unclear ?        | C            |
| Hickson 2007[5]    | Yes +                   | N.R. ?                 | Yes +                               | Yes +           | Yes +            | A            |
| Safdar 2008[6]     | Yes +                   | Yes +                  | Yes +                               | Yes +           | N.R. ?           | B            |
| Sampalis 2010[7]   | N.R. ?                  | N.R. ?                 | Yes +                               | Yes +           | Unclear ?        | C            |
| Gao 2010[1]        | Yes +                   | Yes +                  | Yes +                               | Yes +           | Yes +            | A            |
| Allen 2013[8]      | Yes +                   | Yes +                  | Yes +                               | Yes +           | Yes +            | A            |
| Selinger 2013[9]   | Yes +                   | Yes +                  | Yes +                               | Yes +           | Unclear ?        | B            |
| Ouwehand 2014[10]  | Yes +                   | Yes +                  | Yes +                               | Yes +           | Yes +            | A            |

## References

1. Gao XW, Mubasher M, Fang CY, Reifer C, Miller LE. Dose-response efficacy of a proprietary probiotic formula of *Lactobacillus acidophilus* CL1285 and *Lactobacillus casei* LBC80R for antibiotic-associated diarrhea and *Clostridium difficile*-associated diarrhea prophylaxis in adult patients. *The American journal of gastroenterology*. 2010 Jul;105(7):1636-41.
2. Heimbürger DC, Sockwell DG, Geels WJ. Diarrhea with enteral feeding: prospective reappraisal of putative causes. *Nutrition*. 1994 Sep-Oct;10(5):392-6.
3. Plummer S, Weaver MA, Harris JC, Dee P, Hunter J. *Clostridium difficile* pilot study: effects of probiotic supplementation on the incidence of *C. difficile* diarrhoea. *International microbiology : the official journal of the Spanish Society for Microbiology*. 2004 Mar;7(1):59-62.
4. Beausoleil M, Fortier N, Guenette S, L'Ecuyer A, Savoie M, Franco M, et al. Effect of a fermented milk combining *Lactobacillus acidophilus* C11285 and *Lactobacillus casei* in the prevention of antibiotic-associated diarrhea: a randomized, double-blind, placebo-controlled trial. *Canadian journal of gastroenterology = Journal canadien de gastroenterologie*. 2007 Nov;21(11):732-6.
5. Hickson M, D'Souza AL, Muthu N, Rogers TR, Want S, Rajkumar C, et al. Use of probiotic *Lactobacillus* preparation to prevent diarrhoea associated with antibiotics: randomised double blind placebo controlled trial. *BMJ (Clinical research ed)*. 2007 Jul 14;335(7610):80.
6. Safdar N, Barigala R, Said A, McKinley L. Feasibility and tolerability of probiotics for prevention of antibiotic-associated diarrhoea in hospitalized US military veterans. *Journal of clinical pharmacy and therapeutics*. 2008 Dec;33(6):663-8.
7. Sampalis J, Psaradellis E, Rampakakis E. Efficacy of BIO K+ CL1285 in the reduction of antibiotic-associated diarrhea - a placebo controlled double-blind randomized, multi-center study. *Archives of medical science : AMS*. 2010 Mar 1;6(1):56-64.
8. Allen SJ, Wareham K, Bradley C, Harris W, Dhar A, Brown H, et al. A multicentre randomised controlled trial evaluating lactobacilli and bifidobacteria in the prevention of antibiotic-associated diarrhoea in older people admitted to hospital: the PLACIDE study protocol. *BMC infectious diseases*. 2012;12:108.
9. Selinger CP, Bell A, Cairns A, Lockett M, Sebastian S, Haslam N. Probiotic VSL#3 prevents antibiotic-associated diarrhoea in a double-blind, randomized, placebo-controlled clinical trial. *The Journal of hospital infection*. 2013 Jun;84(2):159-65.
10. Ouwehand AC, DongLian C, Weijian X, Stewart M, Ni J, Stewart T, et al. Probiotics reduce symptoms of antibiotic use in a hospital setting: a randomized dose response study. *Vaccine*. 2014 Jan 16;32(4):458-63.
