# Supplementary material
Source: PubMed Central journal article supplement (PMC5173486)
Supplement: supp_4.4.E706_2016-0087_Original_submission.pdf [file supp_4.4.E706_2016-0087_Original_submission.pdf]

1  
2  
3 **Title: *Lactobacillus* probiotics in the prevention of *Clostridium difficile* associated**  
4 **diarrhoea: A systematic review and meta-analysis**  
5  
6  
7

8 **Authors:** Alison Sinclair MD<sup>1</sup>, Xuanqian Xie MSc<sup>1</sup>, Nandini Dendukuri PhD<sup>1\*</sup>.  
9

10 1. Technology Assessment Unit of the McGill University Health Centre, 687 Pine Avenue  
11 West, Montréal, Quebec, Canada H3A 1A1  
12  
13  
14

15  
16  
17  
18 **\*Corresponding author:**  
19

20 Nandini Dendukuri PhD  
21

22 Director, Technology Assessment Unit, McGill University Health Centre  
23

24 Associate Professor, Department of Medicine, McGill University  
25  
26

27 Mailing Address:  
28

29 Royal Victoria Hospital  
30

31 687 Pine Ave, West R4.09  
32  
33

34 Montreal, QC H3A 1A1  
35  
36

37 Canada.  
38

39 Tel: 514 934 1934 x 36916  
40

41 Fax: 514 843 1493  
42  
43

44 Email: [nandini.dendukuri@mcgill.ca](mailto:nandini.dendukuri@mcgill.ca)  
45  
46  
47  
48

49 **Word count:** 3311 words, 3 tables and 4 figures.  
50  
51  
52

53 **Running head:** *Lactobacillus* probiotics for prevention of *C. difficile* diarrhea  
54  
55  
56  
57  
58  
59  
60

1  
2  
3 **Competing interest statement:**  
4  
5

6 All authors have completed the ICMJE uniform disclosure form  
7 at [http://www.icmje.org/coi\\_disclosure.pdf](http://www.icmje.org/coi_disclosure.pdf) and declare: no support from any organisation for the  
8 submitted work; no financial relationships with any organisations that might have an interest in  
9 the submitted work in the previous three years, no other relationships or activities that could  
10 appear to have influenced the submitted work.  
11  
12  
13  
14  
15  
16  
17  
18  
19  
20  
21  
22  
23  
24  
25  
26  
27  
28  
29  
30  
31  
32  
33  
34  
35  
36  
37  
38  
39  
40  
41  
42  
43  
44  
45  
46  
47  
48  
49  
50  
51  
52  
53  
54  
55  
56  
57  
58  
59  
60

Confidential

**Abstract (228 words)**

**Background:** Recent meta-analyses of the efficacy of probiotics for prevention of *C. difficile* associated diarrhea have concluded that there is a large effect in favour of probiotics based on moderate quality evidence. We re-examine this evidence which contradicts the results of a more recent, large randomized controlled trial that found no benefit of lactobacillus probiotics.

**Methods:** We carried out an updated systematic review and meta-analysis using a Bayesian hierarchical model. We included only double-blinded studies of lactobacillus probiotics vs placebo in adults. In addition to pooling results across studies, we report on the between-study heterogeneity and the prediction interval which reflects the uncertainty in the efficacy estimate for a future study.

**Findings:** We identified 10 randomized controlled trials that met our inclusion criteria. The pooled risk ratio (95% credible interval) across these studies was 0.25 (0.08, 0.47). The corresponding prediction interval was (0.02, 1.34), reflecting high heterogeneity between studies. A meta-regression analysis suggested that the log risk ratio increased with the risk in the control group, though the association was not statistically significant.

**Interpretation:** Taking into account the between study heterogeneity reveals that there is considerable uncertainty regarding the efficacy estimate associated with lactobacillus probiotics. Most studies so far have been carried out in populations with a low risk of CDAD such that the evidence is inconclusive and inadequate to support a policy concerning routine use of probiotics.

## Introduction

*Clostridium difficile* associated diarrhoea (CDAD) is associated with significant morbidity and mortality in hospitalized patients[1, 2], its manifestations ranging from debilitating diarrhoea, to toxic megacolon requiring surgical intervention, to death[3]. Nosocomial CDAD is strongly associated with antibiotic therapy[4], the mechanism of risk believed to be antibiotic-associated disruption of the intestinal flora. At an institutional level, prevention is by infection control measures. At a patient level, there has been great interest in re-establishing normal biota via fecal transfer in recurrent *Clostridium difficile*[5], and especially by prophylactic administration of purified microbial preparations ('probiotics'), due to their low cost and easy availability. Consistently, meta-analyses have estimated a protective effect of probiotics of various strains against CDAD[6-8], on the basis of a clinically heterogeneous group of small to medium sized studies of generally moderate quality. However, a recent large, well-run study failed to demonstrate statistically significant preventative effect of a mixture of *Lactobacillus acidophilus* and bifidobacteria in elderly hospitalized patients[9].

Such discrepancies between the results of early meta-analyses and subsequent, large randomized trials have been noted before[10], and attributed to publication bias in the form of selected publication of small randomized controlled trials reporting optimistic results. In the case of probiotics, we also believe that standard statistical meta-analysis methods may underestimate the statistical heterogeneity between the published studies. Meta-analyses published to date[6, 7, 11] have used the traditional DerSimonian-Laird approach for meta-analysis, which is known to underestimate heterogeneity[12]. In order to address the issue of between-study heterogeneity more thoroughly, we have updated our previous systematic review of probiotics in the prevention of CDAD in adults[13], and conducted a meta-analysis of *Lactobacillus* species probiotics, applying Bayesian hierarchical methods.

## Methods

Our systematic literature search was first carried out for the period until 2005[13], and subsequently extended to include additional databases and updated[14, 15]. The search covered PubMed, EMBASE, AMED and CINAHL. Search terms included "probiotic\*" (where \* indicates a wildcard), "Lactobacill\*", and terms specific for the organisms themselves, combined with "antibiotic associated diarrhea", "Clostridium" or "difficile" (see supplementary material for details). The search was last updated on March 20, 2014. In addition, we closely reviewed the included and excluded papers from published systematic reviews and meta-analyses for inclusion. Results were summarized using an adapted version of the PRISMA flow-diagram suitable for updates of systematic reviews[16].

To be included in the meta-analysis, a study had to have been described as a double-blind RCT recruiting predominately or exclusively adult in-patients who were receiving antibiotics of any kind and for any indication. Double-blinding of patients and study personnel responsible for measuring outcomes would reduce the risk of ascertainment bias of CDAD cases in studies with incomplete testing, and enabled us to use a missing at random assumption to adjust for missing

1  
2  
3 data (see below). The active treatment had to contain *Lactobacillus* species at any dose. We  
4 excluded yeast studies to reduce the heterogeneity of interventions, and studies in children and  
5 community-acquired CDAD because these represented a different population. CDAD had to be  
6 defined as diarrhea with a positive culture or toxin assay for *C difficile*, and the paper had to  
7 report sufficient information about numbers tested to allow for adjustment for incomplete testing  
8 for *C difficile*.  
9

10  
11 At least two authors (AS, XX and ND) participated in each of the literature searches, study  
12 design quality review or data extraction. From each study we extracted the number of patients in  
13 the intervention and placebo groups, the numbers of patients who had diarrhea in each group, the  
14 number who were tested for *C. difficile* and the number who were classified as having CDAD. In  
15 addition, we extracted descriptive information (study location, inclusion criteria, probiotic strain  
16 and dose, method of testing for *C difficile*, and source of funding; see Table 1) and patient  
17 demographics and covariates (mean age, proportion by sex, proportion receiving each group or  
18 class of antibiotics; see Table 1). We assessed the risk of four biases described by the Cochrane  
19 Collaboration (selection, treatment, attrition, and detection), as no, yes, and unclear (which  
20 included instances where we had insufficient information to assess risk of bias). We then  
21 classified studies as A (no major sources of bias), B (one possible source of bias), and C (two or  
22 more possible sources of bias). We used a funnel plot to assess the relationship between the  
23 standard error of the log risk ratio and its standard error reported in the individual studies that  
24 suggested publication bias.  
25  
26  
27  
28  
29  
30

### 31 *Statistical methods*

32  
33 Our primary outcome of interest was CDAD (Table 1). We analysed the data for all patients  
34 randomized in each study, assuming firstly that patients who had no recorded AAD were  
35 negative for AAD, and secondly that missing information on the results of testing for *C difficile*  
36 in patients with AAD was missing at random (MAR). The missing at random assumption was  
37 based on the expectation that, since double blinded studies were selected, the group to which a  
38 patient was randomized could not influence the decision to test for CDAD. Studies using  
39 different doses and formulations of lactobacillus probiotics were included, and where the study  
40 design included two probiotics groups (low and high dose), probiotic users were combined in a  
41 single group. There was considerable heterogeneity in the risk of CDAD in the placebo group of  
42 the selected studies. To examine the relation between this risk and the reported effect size we  
43 used a L'Abbé plot.  
44  
45  
46  
47  
48

49 We used an exact Bayesian random effects meta-analysis model to pool the log risk ratios across  
50 studies while accounting for the heterogeneity within and between studies[17]. We used vague  
51 prior distributions over all parameters so as to let the observed data dominate the final results.  
52 From the meta-analysis, we extracted the pooled risk ratio together with its 95% credible  
53 interval. We also extracted the 95% prediction interval that reflects the uncertainty in the  
54 estimated risk ratio in an individual study in the future. If there is a high degree of between-study  
55  
56  
57  
58  
59  
60

1  
2  
3 heterogeneity, we would expect the prediction interval to be much wider than the credible  
4 interval for the pooled risk ratio.  
5

6  
7 We also carried out a Bayesian credibility analysis as an alternative approach to study the extent  
8 of uncertainty about the pooled result[18]. This approach measures the degree of scepticism  
9 needed in order to remain unconvinced by a statistically significant pooled risk ratio from a  
10 meta-analysis. If a reasonable degree of scepticism leads us to doubt the results of the meta-  
11 analysis, then we would draw a more nuanced conclusion despite the statistical significance. On  
12 the other hand, if an unreasonably high degree of scepticism is required, then we would be more  
13 convinced by the results of the meta-analysis. The credibility analysis approach requires the  
14 derivation of a 'critical' sceptical prior distribution for the pooled risk ratio, which is sufficiently  
15 influential so as to convert the significant result (based on the data alone) into a non-significant  
16 result. The critical sceptical prior distribution is a symmetric distribution centred over the risk  
17 ratio of 1. When the results of individual studies are consistent, i.e. when between-study  
18 heterogeneity is absent or low, the critical sceptical prior would be concentrated around 1 with a  
19 small variance (high scepticism). When results from individual studies are inconsistent, i.e. there  
20 is a high degree of between-study heterogeneity, the critical sceptical prior would be more spread  
21 out around 1 with a wider variance (low scepticism).  
22

23  
24 For comparison with standard meta-analytical techniques, we also used the widely applied  
25 approximate method described by DerSimonian and Laird[19]. For studies that had 0 cells in the  
26 cross-tabulation between probiotics and CDAD we added 0.5 to all cells. Here as well we  
27 adjusted the results in studies with incomplete testing. To do this we assumed the same  
28 proportion of positive CDAD tests among the missing as the non-missing.  
29

30  
31 Bayesian analyses were carried out using WinBUGS version 1.4.3 for Windows[20]. The  
32 frequentist analysis was implemented using the R statistical software version 3.0.1 [21] package  
33 rmeta version 1.6.2 [22]. Descriptive statistics and graphs were obtained using either the R 3.0.1  
34 [21] or SAS 9.3[23] statistical software packages.  
35

36  
37 We examined possible sources of between-study heterogeneity using Bayesian meta-regression  
38 models[24] relating the pooled risk ratio to study quality (no major sources of bias [A] identified  
39 versus at least one source of bias[B/C]), population prevalence of CDAD (as estimated by the  
40 adjusted proportion of patients with CDAD in the placebo group, either as a continuous variable  
41 or dichotomized at the median value <6% versus ≥6%), composition of the probiotic  
42 (preparations containing only lactobacillus species vs. mixed preparations), dose of probiotic  
43 (dichotomized at the median value of <50 vs ≥50 million CFUs) and whether or not studies  
44 received industry funding (any support vs. none). By using the exact likelihood, the Bayesian  
45 approach addresses problems that have been previously identified with meta-regression models  
46 adjusting for the control group risk [25].  
47

48  
49 We conducted sensitivity analyses to study the robustness of our Bayesian analysis. We varied  
50 the prior distribution over the standard deviation of the between-study heterogeneity, as this is  
51 known to influence the results of the meta-analysis[24]. We conducted a meta-analysis including  
52  
53  
54

1  
2  
3 the results of studies that did not report information on testing to see if they were systematically  
4 different from those in our primary analysis, assuming, as the authors did, that untested patients  
5 were negative for CDAD. We also performed a sensitivity analysis that excluded the study by  
6 Gao et al [26], reasoning that their results were not generalizable to other settings due to the  
7 extremely high risk of CDAD reported in the placebo group.  
8

9  
10 The PRISMA checklist[27] was completed to ensure proper reporting (Supplementary Table 2).  
11  
12

## 13 14 **Results**

15  
16 Our search identified ten trials that qualified for inclusion[9, 26, 28-36], (Figure 1; Table 1). A  
17 further seven trials[37-42] were not included in the primary meta-analysis because we could not  
18 obtain information on the number tested for CDAD, but were included in a sensitivity analysis of  
19 unadjusted data.  
20  
21

22 Included trials ranged in size from 34 to 2981 patients, and were conducted in Canada, the US,  
23 the UK, and China. Patients received *Lactobacillus* species as single preparations or in  
24 combination, in doses ranging from <20 to 450 billion colony forming units (the latter figure was  
25 a total dose of a mixed preparation) given as yoghurt, capsules, or powder. A variety of  
26 definitions of diarrhoea were used, allowing for one to three liquid stools, over one to three days,  
27 with or without application of a formal scale. Details of the design in these studies are  
28 summarized in Table 1, including definition of diarrhoea, probiotic and dose, assay for *C*  
29 *difficile*, length of treatment and length of follow-up.  
30  
31

32 After adjustment for incomplete testing for *C difficile* in five studies, the proportion of patients  
33 with CDAD in the probiotics group ranged from 0 to 8%, and in the placebo group from 0 to  
34 24% (Figure 2). In two studies, no cases of CDAD were identified. In total, CDAD was detected  
35 for 45 out of 2554 patients in the *Lactobacillus* group and 90 out of 2287 patients in the placebo  
36 group. The L'Abbé plot in Figure 2 shows that as the risk of CDAD in the placebo group  
37 increased, the apparent benefit of probiotics increased (i.e. the individual study risk ratio was  
38 more likely to be less than 1).  
39  
40  
41  
42

43 A forest plot summarizing the results of the Bayesian hierarchical meta-analysis is presented in  
44 Figure 3. The RRs of *Lactobacillus* versus placebo for individual studies ranged from 0.02 to  
45 0.66. Using the Bayesian meta-analysis model, the median pooled RR was estimated to be 0.25  
46 (95% credible interval [CrI]: 0.08, 0.47), indicating a statistically significant association on  
47 average between *Lactobacillus* and a lower risk of CDAD for inpatients, with a 75% risk  
48 reduction relative to placebo. The predicted RR in a new trial was estimated to be 0.25 (95% CrI:  
49 0.02, 1.34), the wide CrI also reflecting the heterogeneity, and the resulting predictive  
50 uncertainty. Between-study standard deviation on the log risk ratio scale was 0.64 [95% CrI:  
51 0.06, 1.75], which was relatively high, indicating considerable statistical heterogeneity between  
52 studies.  
53  
54  
55  
56  
57  
58  
59  
60

1  
2  
3 The critical sceptical prior over the pooled risk ratio was centred at 1 and ranged from (0.6, 1.7).  
4 This means a sceptic with a prior opinion that the true risk ratio ranges anywhere from 0.6 to 1.7  
5 would remain unconvinced by the statistically significant pooled risk ratio that there is a  
6 favourable effect of probiotics as the posterior 95% credible interval would include a risk ratio of  
7 1 (Figure 3). We considered this range to be quite wide and reflective of a reasonable degree of  
8 scepticism, as it is unusual for a pharmaceutical intervention to be associated with a risk ratio  
9 outside of this range. Thus the credibility analysis suggests that despite the statistically  
10 significant pooled risk ratio from the Bayesian meta-analysis, the evidence in favour of  
11 probiotics was not very robust and the final conclusion could be altered by use of a weakly  
12 informative prior distribution. The information in the critical sceptical prior distribution can also  
13 be expressed as being equivalent to information from a balanced, null randomized controlled trial  
14 with 30 CDAD events observed in each arm. In other words, despite the total number of cases of  
15 CDAD being 135 in the studies included in the meta-analysis, the combined information across  
16 the studies was relatively weak and could be displaced by information from a trial with only 60  
17 observed cases of CDAD.  
18  
19  
20  
21  
22  
23

24 In comparison, when a random effects model with the DerSimonian-Laird estimator was applied  
25 to the adjusted data, the between study standard deviation is estimated to be 0.02 (Q-test p-value  
26 0.4029) leading to the conclusion that there is no evidence of heterogeneity between studies. The  
27 resulting pooled estimate of the RR was 0.42 (95% CI 0.29, 0.59).  
28  
29

30 The funnel plot for the meta-analysis (Figure 4) suggests the potential for publication bias as we  
31 see an asymmetry in the scatter of points with studies with higher standard errors reporting  
32 smaller risk ratios favouring probiotics. However, it should be noted that this interpretation is  
33 limited by the small number of studies and the presence of heterogeneity between the  
34 studies[43].  
35  
36

37 The pooled risk ratio was not significantly associated with any of the covariates we examined,  
38 with the 95% credible intervals for the regression coefficient including zero in all cases (Table  
39 3). None the less the probability of an association was high for some covariates. High study  
40 quality and high dose of probiotic were more likely to be associated with risk ratios approaching  
41 1. Studies with a higher risk of CDAD in the placebo group or with industry funding were more  
42 likely to report a risk ratio well below 1.  
43  
44  
45

46 Our sensitivity analyses showed that the pooled risk ratio is robust to changes in the prior  
47 distribution for the between-study variance (Supplementary Table 1). The width of the prediction  
48 interval increased but did not affect our inferences. The exclusion of the study by Gao et al. with  
49 the high risk of CDAD in the placebo group did not affect the results greatly. The inclusion of  
50 the 5 studies that did not have complete results on testing also did not change the pooled risk  
51 ratio, though the estimate of the between-study standard deviation decreased owing to ignoring  
52 the fact that the proportion of subjects tested was missing (Supplementary Table 1).  
53 Accordingly, the prediction interval was narrower, barely crossing 1.  
54  
55  
56  
57  
58  
59  
60



## Interpretation

Our meta-analysis suggests that probiotics containing *Lactobacillus* species have a preventative effect on CDAD with a pooled relative risk reduction of 75%. This effect size is consistent with other meta-analyses of various probiotics[6, 7, 11] using the standard DerSimonian and Laird method. However, the wide credible interval around the predicted benefit in a future study includes a risk ratio of 1 and reflects considerable heterogeneity in the included studies. Although on average there appears to be a beneficial effect of probiotics, it is uncertain whether this benefit would be observed in a future study that would meet our inclusion criteria. The observed heterogeneity could not be explained conclusively by study-level characteristics such as risk of bias, background risk of CDAD as measured by frequency in the placebo arm, higher versus lower dose of probiotics, or financial support from industry, due in part to the small number of studies we identified. However, there appears to be suggestive evidence that in order to observe a beneficial effect of CDAD in a single study, a high background risk of CDAD is needed. This leads us to conclude that it is premature to suggest that there is a beneficial effect of *Lactobacillus* probiotics in all settings.

Our conclusion is supported by a Bayesian credibility analysis which suggests that the statistically significant results of the meta-analysis could be altered by use of a weakly informative sceptical prior distribution.

Our inclusion criteria and our requirements for data for adjustment limited the number of studies included, although a sensitivity analysis with excluded studies did not change the results. The meta-regression for important covariates was therefore relatively insensitive on account of the small number of studies in each group. The total number of CDAD cases was small, with the largest number of cases contributed by a study[26] from China with the highest rate of CDAD in the placebo arm (24%, compared with 19% in a study conducted during an outbreak in Quebec hospitals[32]). Omitting that study, however, did not affect the effect estimate. The recent large RCT by Allen et al[9, 35] was planned during an outbreak, and the success of other preventative measures resulted in a lower incidence of CDAD than anticipated and a loss of power, while another trial was stopped early, having reached its co-primary endpoint for AAD before identifying any CDAD cases[29]. Thus we see that a challenge in conducting these RCTs is to attain a sufficient number of CDAD cases to allow estimation of the effect of probiotics. Other potential contributors to under-detection of cases were the insensitivity of the test used to detect CDAD[44] in earlier studies, and insufficiently long follow-up in some studies, since trials that followed patients after discharge identified additional CDAD [32, 33]. Neither of these conditions is expected to contribute to a differential misclassification and thereby introduce bias. We assumed that missing tests had the same probability of being positive as available tests, although, if testing depended upon severity of diarrhea, we may be overestimating the number of positive tests. Nevertheless, our adjustment produced only slight changes to the risk ratios.

Although the studies included in the meta-analysis met our inclusion criteria, they were clinically heterogeneous in factors relating to background risk of CDAD, and species, dose and duration of

1  
2  
3 probiotic. As is common with studies involving complementary medicines, there was wide  
4 variation in dose and formulation. We selected only studies where the probiotic was either a pure  
5 *Lactobacillus* preparation or a mixture of *Lactobacillus* and other species but did not restrict the  
6 dose, on the assumption that a minimum dose was required for colonization of the colon and that  
7 this minimum dose was achieved in all studies.  
8  
9

10  
11 We did not assess safety in our analysis, since this has been done by others [11, 45, 46].  
12 Probiotics appear to be safe in the population included in the randomized controlled trials,  
13 although these trials contained some important exclusions of patients at high risk of infection.  
14 More recent reviews have begun to address the safety of probiotics in these patients[47].  
15  
16

## 17 **Conclusion**

18  
19 Statistical heterogeneity as well as clinical heterogeneity reduces our confidence in the evidence  
20 favouring probiotics containing *Lactobacillus* species for reducing the risk of *C difficile*  
21 associated infection in patients receiving antibiotics. This is consistent with the results of a  
22 recently released clinical trial of *Lactobacillus* in elderly patients, although for both the meta-  
23 analysis and the trial the number of cases was relatively few. Future research will need to take  
24 account of the changing epidemiology of *C difficile*, with reduced incidence in hospital settings  
25 where active prevention measures have been taken, and identification of risks in the community,  
26 and adjust trial sizes and settings accordingly.  
27  
28  
29  
30  
31

## 32 **References**

- 33  
34  
35  
36 1. Gilca R, Hubert B, Fortin E, Gaulin C, Dionne M. Epidemiological patterns and hospital  
37 characteristics associated with increased incidence of Clostridium difficile infection in Quebec,  
38 Canada, 1998-2006. InfectControl HospEpidemiol. 2010 9/2010;31(9):939-47.  
39 2. Loo VG, Poirier L, Miller MA, Oughton M, Libman MD, Michaud S, et al. A  
40 predominantly clonal multi-institutional outbreak of Clostridium difficile-associated diarrhea  
41 with high morbidity and mortality. N Engl J Med. 2005 12/8/2005;353(23):2442-9.  
42 3. Barbut F, Petit JC. Epidemiology of Clostridium difficile-associated infections. Clin  
43 MicrobiolInfect. 2001 8/2001;7(8):405-10.  
44 4. Brown KA, Khanafer N, Daneman N, Fisman DN. Meta-analysis of antibiotics and the  
45 risk of community-associated Clostridium difficile infection. Antimicrobial agents and  
46 chemotherapy. 2013 May;57(5):2326-32.  
47 5. van Nood E, Vrieze A, Nieuwdorp M, Fuentes S, Zoetendal EG, de Vos WM, et al.  
48 Duodenal infusion of donor feces for recurrent Clostridium difficile. N Engl J Med. 2013 Jan  
49 31;368(5):407-15.  
50 6. Johnson S, Maziade PJ, McFarland LV, Trick W, Donskey C, Currie B, et al. Is primary  
51 prevention of Clostridium difficile infection possible with specific probiotics? International  
52 journal of infectious diseases. 2012 Nov;16(11):e786-92.  
53  
54  
55  
56  
57  
58  
59  
60

- 1
- 2
- 3
- 4
- 5
- 6
7. Johnston BC, Ma SS, Goldenberg JZ, Thorlund K, Vandvik PO, Loeb M, et al. Probiotics for the prevention of Clostridium difficile-associated diarrhea: a systematic review and meta-analysis. *Ann Intern Med.* 2012 Dec 18;157(12):878-88.
8. Goldenberg JZ, Ma SS, Saxton JD, Martzen MR, Vandvik PO, Thorlund K, et al. Probiotics for the prevention of Clostridium difficile-associated diarrhea in adults and children. *Cochrane Database Syst Rev.* 2013;5:CD006095.
9. Allen SJ, Wareham K, Wang D, Bradley C, Hutchings H, Harris W, et al. Lactobacilli and bifidobacteria in the prevention of antibiotic-associated diarrhoea and Clostridium difficile diarrhoea in older inpatients (PLACIDE): a randomised, double-blind, placebo-controlled, multicentre trial. *Lancet.* 2013 Oct 12;382(9900):1249-57.
10. Higgins JP, Spiegelhalter DJ. Being sceptical about meta-analyses: a Bayesian perspective on magnesium trials in myocardial infarction. *International journal of epidemiology.* 2002 Feb;31(1):96-104.
11. Goldenberg JZ, Ma SS, Saxton JD, Martzen MR, Vandvik PO, Thorlund K, et al. Probiotics for the prevention of Clostridium difficile-associated diarrhea in adults and children. *Cochrane Database Syst Rev.* 2013;5:CD006095.
12. Cornell JE, Mulrow CD, Localio R, Stack CB, Meibohm AR, Guallar E, et al. Random-Effects Meta-analysis of Inconsistent Effects: A Time for Change. *Ann Intern Med.* 2014 Feb 18;160(4).
13. Dendukuri N, Costa V, McGregor M, Brophy JM. Probiotic therapy for the prevention and treatment of Clostridium difficile-associated diarrhea: a systematic review. *CMAJ.* 2005 7/19/2005;173(2):167-70.
14. Sinclair A, Xie X, Dendukuri N. The Use of Lactobacillus probiotics in the Prevention of Antibiotic Associated Clostridium Difficile Diarrhea. Montreal (Canada): McGill University Health Centre (MUHC), (TAU) TAU;2011 Dec 19 Contract No.: Report no. 54.
15. Xie X, McGregor M, Dendukuri N. The use of probiotics in the prevention and treatment of Clostridium difficile diarrhea: An update: McGill University Health Centre (MUHC), (TAU) TAU;2009 November 25. Report No.: Report number 44.
16. Stovold E, Beecher D, Foxlee R, Noel-Storr A. Study flow diagrams in Cochrane systematic review updates: an adapted PRISMA flow diagram. *Syst Rev.* 2014;3:54.
17. Warn DE, Thompson SG, Spiegelhalter DJ. Bayesian random effects meta-analysis of trials with binary outcomes: methods for the absolute risk difference and relative risk scales. *Stat Med.* 2002 Jun 15;21(11):1601-23.
18. Matthews RAJ. Methods for assessing the credibility of clinical trial outcomes. *Drug Information J.* 2001 10/2001;35(4):1469-78.
19. DerSimonian R, Laird N. Meta-analysis in clinical trials. *Control Clin Trials.* 1986 9/1986;7(3):177-88.
20. Lunn DJ, Thomas A, Best N, Spiegelhalter D. WinBUGS - A Bayesian modelling framework: Concepts, structure, and extensibility. *Statistics and Computing.* 2000 10/2000;10(4):325-37.
21. Team RDC. R: A language and environment for statistical computing. Vienna, Austria: R Foundation for Statistical Computing; 2010.
22. Lumley T. rmeta: Meta-analysis. R package version 2.16. 2009.
23. Inc. SI. SAS Online Doc. 9.3 ed. Cary, North Carolina, USA2014.
24. Spiegelhalter DJ, Abrams KR, Myles JP. Bayesian approaches to clinical trials and health-care evaluation: John Wiley and Sons; 2004.

- 1
  - 2
  - 3
  - 4
  - 5
  - 6
  - 7
  - 8
  - 9
  - 10
  - 11
  - 12
  - 13
  - 14
  - 15
  - 16
  - 17
  - 18
  - 19
  - 20
  - 21
  - 22
  - 23
  - 24
  - 25
  - 26
  - 27
  - 28
  - 29
  - 30
  - 31
  - 32
  - 33
  - 34
  - 35
  - 36
  - 37
  - 38
  - 39
  - 40
  - 41
  - 42
  - 43
  - 44
  - 45
  - 46
  - 47
  - 48
  - 49
  - 50
  - 51
  - 52
  - 53
  - 54
  - 55
  - 56
  - 57
  - 58
  - 59
  - 60
25. Arends LR, Hoes AW, Lubsen J, Grobbee DE, Stijnen T. Baseline risk as predictor of treatment benefit: three clinical meta-re-analyses. *Stat Med.* [Comparative Study]. 2000 Dec 30;19(24):3497-518.
26. Gao XW, Mubasher M, Fang CY, Reifer C, Miller LE. Dose-response efficacy of a proprietary probiotic formula of *Lactobacillus acidophilus* CL1285 and *Lactobacillus casei* LBC80R for antibiotic-associated diarrhea and *Clostridium difficile*-associated diarrhea prophylaxis in adult patients. *AmJ Gastroenterol.* 2010 7/2010;105(7):1636-41.
27. Moher D, Liberati A, Tetzlaff J, Altman DG. Preferred reporting items for systematic reviews and meta-analyses: the PRISMA statement. *Ann Intern Med.* [Guideline Research Support, Non-U.S. Gov't]. 2009 Aug 18;151(4):264-9, W64.
28. Ouwehand AC, Donglian C, Weijian X, Stewart M, Ni J, Stewart T, et al. Probiotics reduce symptoms of antibiotic use in a hospital setting: A randomized dose response study. *Vaccine.* 2014 Jan 16;32(4):458-63.
29. Selinger CP, Bell A, Cairns A, Lockett M, Sebastian S, Haslam N. Probiotic VSL#3 prevents antibiotic-associated diarrhoea in a double-blind, randomized, placebo-controlled clinical trial. *The Journal of hospital infection.* 2013 Jun;84(2):159-65.
30. Sampalis J, Psaradellis E, Rampakakis E. Efficacy of BIO K+ CL1285 in the reduction of antibiotic-associated diarrhea - a placebo controlled double-blind randomized, multi-center study. *Archives of medical science : AMS.* 2010 Mar 1;6(1):56-64.
31. Safdar N, Barigala R, Said A, McKinley L. Feasibility and tolerability of probiotics for prevention of antibiotic-associated diarrhoea in hospitalized US military veterans. *Journal of Clinical Pharmacy and Therapeutics.* 2008 12/2008;33(6):663-8.
32. Beausoleil M, Fortier N, Guenette S, L'ecuyer A, Savoie M, Franco M, et al. Effect of a fermented milk combining *Lactobacillus acidophilus* C11285 and *Lactobacillus casei* in the prevention of antibiotic-associated diarrhea: a randomized, double-blind, placebo-controlled trial. *CanJ Gastroenterol.* 2007 11/2007;21(11):732-6.
33. Hickson M, D'Souza AL, Muthu N, Rogers TR, Want S, Rajkumar C, et al. Use of probiotic *Lactobacillus* preparation to prevent diarrhoea associated with antibiotics: randomised double blind placebo controlled trial. *BMJ.* 2007 7/14/2007;335(7610):80.
34. Plummer S, Weaver MA, Harris JC, Dee P, Hunter J. *Clostridium difficile* pilot study: effects of probiotic supplementation on the incidence of *C. difficile* diarrhoea. *Int Microbiol.* 2004 3/2004;7(1):59-62.
35. Allen SJ, Wareham K, Bradley C, Harris W, Dhar A, Brown H, et al. A multicentre randomised controlled trial evaluating lactobacilli and bifidobacteria in the prevention of antibiotic-associated diarrhoea in older people admitted to hospital: the PLACIDE study protocol. *BMC infectious diseases* [serial on the Internet]. 2012; 12: Available from: <http://onlinelibrary.wiley.com/o/cochrane/clcentral/articles/183/CN-00841183/frame.html>.
36. Heimbürger DC, Sockwell DG, Geels WJ. Diarrhea with enteral feeding: prospective reappraisal of putative causes. *Nutrition.* 1994 9/1994;10(5):392-6.
37. Thomas MR, Litin SC, Osmon DR, Corr AP, Weaver AL, Lohse CM. Lack of effect of *Lactobacillus GG* on antibiotic-associated diarrhea: a randomized, placebo-controlled trial. *Mayo Clin Proc.* 2001 9/2001;76(9):883-9.
38. Rafiq R, Pandey D, Mahgoubosman S, Masood R, Donepundi I, Norkus E, et al. Prevention of *Clostridium difficile* diarrhoea with probiotics in hospitalized patients treated with antibiotics. *Gastroenterology.* 2009;132(Suppl 2):A187.

- 1  
2  
3  
4  
5  
6  
7  
8  
9  
10  
11  
12  
13  
14  
15  
16  
17  
18  
19  
20  
21  
22  
23  
24  
25  
26  
27  
28  
29  
30  
31  
32  
33  
34  
35  
36  
37  
38  
39  
40  
41  
42  
43  
44  
45  
46  
47  
48  
49  
50  
51  
52  
53  
54  
55  
56  
57  
58  
59  
60
39. Stein GY, Nanim R, Karniel E, Moskowitz I, Zeidman A. [Probiotics as prophylactic agents against antibiotic-associated diarrhea in hospitalized patients]. *Harefuah*. 2007 Jul;146(7):520-2, 75.
40. Eastmond J, Miller M, Florencio S, Reynolds S, editors. Results of Two Prospective Randomized Studies of Lactobacillus GG (LGG) to Prevent *C. difficile* Infection (CDI) in Hospitalized Adults Receiving Antibiotics. Infectious Diseases Society of America, 46th Annual Meeting; 2008 2008/10/28/: Infectious Diseases Society of America.
41. Wenus C, Goll R, Loken EB, Biong AS, Halvorsen DS, Florholmen J. Prevention of antibiotic-associated diarrhoea by a fermented probiotic milk drink. *Eur J Clin Nutr*. 2008 2/2008;62(2):299-301.
42. Lonnermark E, Friman V, Lappas G, Sandberg T, Berggren A, Adlerberth I. Intake of lactobacillus plantarum reduces certain gastrointestinal symptoms during treatment with antibiotics. *Journal of Clinical Gastroenterology*. 2010 2/2010;44(2):106-12.
43. Ioannidis JP, Trikalinos TA. The appropriateness of asymmetry tests for publication bias in meta-analyses: a large survey. *CMAJ*. 2007 4/10/2007;176(8):1091-6.
44. Brecher SM, Novak-Weekley SM, Nagy E. Laboratory diagnosis of *Clostridium difficile* infections: there is light at the end of the colon. *Clinical infectious diseases : an official publication of the Infectious Diseases Society of America*. 2013 Oct;57(8):1175-81.
45. Hempel S, Newberry S, Ruelaz A, Wang Z, Miles JN, Suttrop MJ, et al. Safety of probiotics used to reduce risk and prevent or treat disease. Evidence report/technology assessment. 2011 Apr(200):1-645.
46. Whelan K, Myers CE. Safety of probiotics in patients receiving nutritional support: a systematic review of case reports, randomized controlled trials, and nonrandomized trials. *Am J Clin Nutr*. 2010 3/2010;91(3):687-703.
47. Redman MG, Ward EJ, Phillips RS. The Efficacy and Safety of Probiotics in People with Cancer: A Systematic Review. *Annals of oncology : official journal of the European Society for Medical Oncology / ESMO*. 2014 Mar 11.

Table 1: Summary of design and risk of bias in randomized controlled trials of probiotics in the prevention of CDAD

| Author, year   | Definition of diarrhea                                                             | Method for detecting <i>C difficile</i>                                                  | Sample size<br>Pro; Pla              | Probiotics <sup>1</sup><br>(cfu x 10 <sup>9</sup> ) | Treatment<br>duration (days)  | Follow-up<br>(days) | Risk of<br>bias <sup>2</sup> |
|----------------|------------------------------------------------------------------------------------|------------------------------------------------------------------------------------------|--------------------------------------|-----------------------------------------------------|-------------------------------|---------------------|------------------------------|
| Ouwehand, 2014 | ≥3 stools Bristol scale 7                                                          | GDH and toxin A EIA; Toxin B by cell culture                                             | Pro-2: 168<br>Pro-1: 168<br>Pla: 167 | LA, LPI, B<br>(Capsule; L Pro-1 2.08,<br>Pro-2 8.5) | Abx <sup>3</sup> + 7          | 4 (post<br>abx)     | A                            |
| Allen, 2013    | ≥3 stools Bristol scale 5-7, or looser than normal by patient report) in 24 hours. | In-house tissue culture assay + EIA for toxins or ELFA for toxins or GDH and toxin A EIA | Pro: 1493<br>Pla: 1488               | LA, B<br>(Capsule; all 60)                          | 21 days                       | 8 weeks<br>total    | A                            |
| Selinger, 2013 | ≥3 stools Bristol scale 6-7                                                        | ELFA for toxins or GDH and toxin A EIA                                                   | 112; 117                             | LA, LPI, LPa, LD, B,<br>ST<br>(Powder               |                               |                     | B                            |
| Gao, 2010      | ≥3 liquid stools in 24 hours                                                       | Triage panel (unspecified) and Toxin B by cell culture                                   | Pro-2: 86<br>Pro-1: 85<br>Pla: 84    | LA and LC<br>(Capsule Pro-1 L 50;<br>Pro-2 L 100)   | Abx3 + 5                      | 21                  | A                            |
| Sampalis, 2010 | ≥1 episodes unformed or liquid stool in 24 hours                                   | Toxin A and B (not specified)                                                            | 216; 221                             | LA and LC<br>(Milk; L 50)                           | Abx3 + 5                      | 21                  | C                            |
| Safdar, 2008   | Either watery or liquid stools for ≥2 consecutive days.                            | Toxin (not specified)                                                                    | 23; 17                               | LA<br>(Capsule; L 60)                               | Pro: 22.8(9.4) Pla: 24.5(4.8) | 0                   | B                            |

<sup>1</sup> Dose of probiotics is given in the form of colony-forming units unless specified otherwise. Where two figures are given, the first represents the total dose of *Lactobacillus* species (L), and the second the dose of other species (O). Abbreviations: N, number; Pro, probiotics; Pla, placebo; comm., commercial; NA, not available; SD, standard deviation; B, *Bifidobacterium*; BC, *B. clausii*; LA, *Lactobacillus acidophilus*; LC, *Lactobacillus casei*; LB= *Lactobacillus bulgaricus*; LD, *Lactobacillus delbrueckii* subsp. *Bulgaricus*; LR, *Lactobacillus rhamnosus*; LPa, *Lactobacillus paracasei*, LPI=*Lactobacillus plantarum*; SB, *Saccharomyces boulardii*; ST, *Streptococcus thermophilus*; CB, *Clostridium butyricum*.

<sup>2</sup> We assessed risk of bias of RCTs included in the meta-analysis according to the Cochrane criteria, mainly focusing on selection bias, performance bias, and attrition bias<sup>11</sup>. RCT quality was categorized into 3 levels, A (low), B (moderate) and C (high).

<sup>3</sup> Probiotics were given for the duration of antibiotic therapy (plus an additional number of days, if indicated)

| Author, year        | Definition of diarrhea                                       | Method for detecting <i>C difficile</i> | Sample size<br>Pro; Pla | Probiotics <sup>1</sup><br>(cfu x 10 <sup>9</sup> ) | Treatment<br>duration (days) | Follow-up<br>(days) | Risk of<br>bias <sup>2</sup> |
|---------------------|--------------------------------------------------------------|-----------------------------------------|-------------------------|-----------------------------------------------------|------------------------------|---------------------|------------------------------|
| Beausoleil,<br>2007 | ≥3 liquid stools in 24<br>hours                              | Cytotoxin assay (not<br>specified)      | 44; 45                  | LA and LC<br>(Milk; L 50)                           | Abx3                         | 21                  | C                            |
| Hickson,<br>2007    | ≥2 liquid stools a day<br>in excess of normal for<br>≥2 days | Toxin (not specified)                   | 69; 66                  | LC, LB, ST<br>(Yogurt; L 22, O 20)                  | Abx3 + 7                     | 28                  | A                            |
| Plummer,<br>2004    | N.A.                                                         | Latex agglutinin or<br>EIA for toxins   | Elderly                 | LA and B<br>(Capsule, total 20)                     | 20                           | 0                   | C                            |
| Heimburger,<br>1994 | >200g stool in 24 hours                                      | Culture and titres                      | 16; 18                  | LA, LB<br>(Granules, dose not<br>given)             | ≥5                           | 0                   | C                            |

Confidential

Table 2: Summary of efficacy and risk of bias in randomized controlled trials of probiotics on AAD and CDAD

| Author<br>(year)    | AAD                                   |                    | P-value | CDAD <sup>a</sup>              |                              | P-value | Risk of<br>bias <sup>c</sup> | Industry<br>funded <sup>d</sup> |
|---------------------|---------------------------------------|--------------------|---------|--------------------------------|------------------------------|---------|------------------------------|---------------------------------|
|                     | no./total no. (%)                     |                    |         | no./total no. <sup>b</sup> (%) |                              |         |                              |                                 |
|                     | Pro                                   | Pla                |         | Pro                            | Pla                          |         |                              |                                 |
| Ouwehand, 2014      | 33/168<br>(19.6);<br>21/168<br>(12.5) | 41/167<br>(24.6)   | <0.05   | 3/33 (9.0);<br>3/21 (14.2)     | 8/41 (19.5)                  | <0.05   | A                            | Yes                             |
| Allen, 2013         | 159/1493<br>(10.6)                    | 153/1488<br>(10.3) | ≥0.05   | 12/93 <sup>e</sup><br>(12.9)   | 17/88 <sup>e</sup><br>(19.3) | ≥0.05   | A                            | No                              |
| Selinger, 2012      | 5/117 (4.3)                           | 10/112<br>(8.9)    | <0.05   | 0/5 (0)                        | 0/4 <sup>e</sup> (0)         | -       | B                            | Yes                             |
| Gao, 2010           | 13/86<br>(15.5);<br>24/85 (28.2)      | 37/84<br>(44.1)    | <0.05   | 1/13 (7.7);<br>8/24 (33.3)     | 20/37<br>(54.1)              | <0.05   | A                            | Yes                             |
| Sampalis, 2010      | 47/216<br>(21.8)                      | 65/221<br>(29.4)   | ≥0.05   | 1/16 <sup>e</sup> (6.3)        | 4/30 <sup>e</sup><br>(13.3)  | ≥0.05   | C                            | Yes                             |
| Safdar, 2008        | 4/23 (17)                             | 6/16 (37)          | ≥0.05   | 0/3 <sup>e</sup> (0)           | 1/4 <sup>e</sup> (25)        | ≥0.05   | B                            | Yes                             |
| Beausoleil, 2007    | 7/44 (16)                             | 16/45 (36)         | <0.05   | 1/2 <sup>e</sup> (50)          | 7/13 <sup>e</sup><br>(53.8)  | ≥0.05   | C                            | Yes                             |
| Hickson, 2007       | 7/57 (12)                             | 19/56 (34)         | <0.05   | 0/56 (0)                       | 9/53 (17)                    | <0.05   | A                            | No                              |
| Plummer, 2004       | 15/69 (22)                            | 15/69 (22)         | ≥0.05   | 2/15 (13)                      | 5/15 (33)                    | ≥0.05   | C                            | No                              |
| Heimbürger,<br>1994 | 5/16 (31)                             | 2/18 (11)          | ≥0.05   | 0/5 (0)                        | 0/2 (0)                      | -       | C                            | No                              |

<sup>a</sup> Definition of CDAD: Diarrhea was present and *C. difficile* test (however defined) was positive in stool sample

<sup>b</sup> Denominator is the number of patients with AAD who were tested for CDAD. Values are prior to adjustment for missing data.

<sup>c</sup> We assessed risk of bias RCTs according to the Cochrane criteria, mainly focusing on selection bias, performance bias, and attrition bias. RCT quality was categorized into 3 levels, A (low), B (moderate) and C (high).

<sup>d</sup> Support from manufacturer included direct study sponsorship. We did not consider supply of investigational material without conditions or support for activities not associated with the study as support from manufacturer.

<sup>e</sup> Adjusted in the analysis for incomplete testing for CDAD.



Table 3 Results of meta-regression models

| Potential source of heterogeneity                             | Number of studies                                                                   | Regression coefficient (95% credible interval) | P(Regression coefficient > 0) <sup>a</sup> |
|---------------------------------------------------------------|-------------------------------------------------------------------------------------|------------------------------------------------|--------------------------------------------|
| Study quality                                                 | A: 4<br>B or C: 6                                                                   | 0.4 (-1.5, 2.5)                                | 0.67                                       |
| Type of probiotic                                             | Lactobacillus only: 5<br>Mixture: 5                                                 | -0.4 (-2.3, 1.6)                               | 0.30                                       |
| Probiotic dose                                                | ≥50 10 <sup>6</sup> CFU <sup>b</sup> : 3<br><50 10 <sup>6</sup> CFU: 6 <sup>c</sup> | 0.4 (-1.7, 2.4)                                | 0.69                                       |
| Support from manufacturer <sup>d</sup>                        | Yes: 6<br>No:4                                                                      | -1.1 (-2.8, 0.7)                               | 0.08                                       |
| Proportion of CDAD in placebo group, dichotomous <sup>e</sup> | ≥6%: 5<br><6%: 5                                                                    | -0.8 (-2.5, 0.8)                               | 0.12                                       |
| Proportion of CDAD in placebo group, continuous               | -                                                                                   | -0.4 (-1.1, 0.6)                               | 0.12                                       |

<sup>a</sup> High values of P(Regression coefficient>0) indicate a high probability of strong positive association between the covariate and the pooled risk ratio, whereas low values indicate a strong negative association between the covariate and the risk ratio.

<sup>b</sup> CFU: Colony forming units.

<sup>c</sup> Dose was missing for one study.

<sup>d</sup> Support from manufacturer included direct study sponsorship. We did not consider supply of investigational material without conditions or support for activities not associated with the study as support from manufacturer.

<sup>e</sup> Proportion of CDAD in placebo group was used to represent population risk (in hospitalized patients given antibiotics) of developing CDAD.

1  
2  
3 Figure 1: Flowchart of study selection  
4

5 Figure 2: L'Abbé plot of proportion of patients with CDAD in Lactobacillus probiotics and  
6 placebo groups in the individual trials included in the meta-analysis.  
7

8  
9 The area of the circles is proportional to the number of patients randomized in the group. Black  
10 circles indicate studies included in the primary analysis, in which adjustment was used to  
11 estimate missing data. Grey circles indicate studies added for the sensitivity analysis, in which  
12 the data for adjustment was not available and patients with missing data were assumed to be  
13 CDAD negative.  
14  
15  
16  
17  
18

19 Figure 3: Forest plot of effect of Lactobacillus on prevention of CDAD (Bayesian analysis)  
20

21 In order from the top, the plot shows the median RRs and 95% credible intervals estimated using  
22 the individual studies, the pooled RR and 95% credible interval and the 95% prediction interval  
23 estimated using a Bayesian meta-analysis with a vague (non-informative prior). The final two  
24 lines are the pooled RR together with the 95% credible and prediction intervals from a Bayesian  
25 meta-analysis with the critical sceptical prior.  
26  
27  
28  
29  
30

31 Figure 4: Funnel plot of studies included in meta-analysis of Lactobacillus in prevention of  
32 CDAD  
33  
34  
35  
36  
37  
38  
39  
40  
41  
42  
43  
44  
45  
46  
47  
48  
49  
50  
51  
52  
53  
54  
55  
56  
57  
58  
59  
60

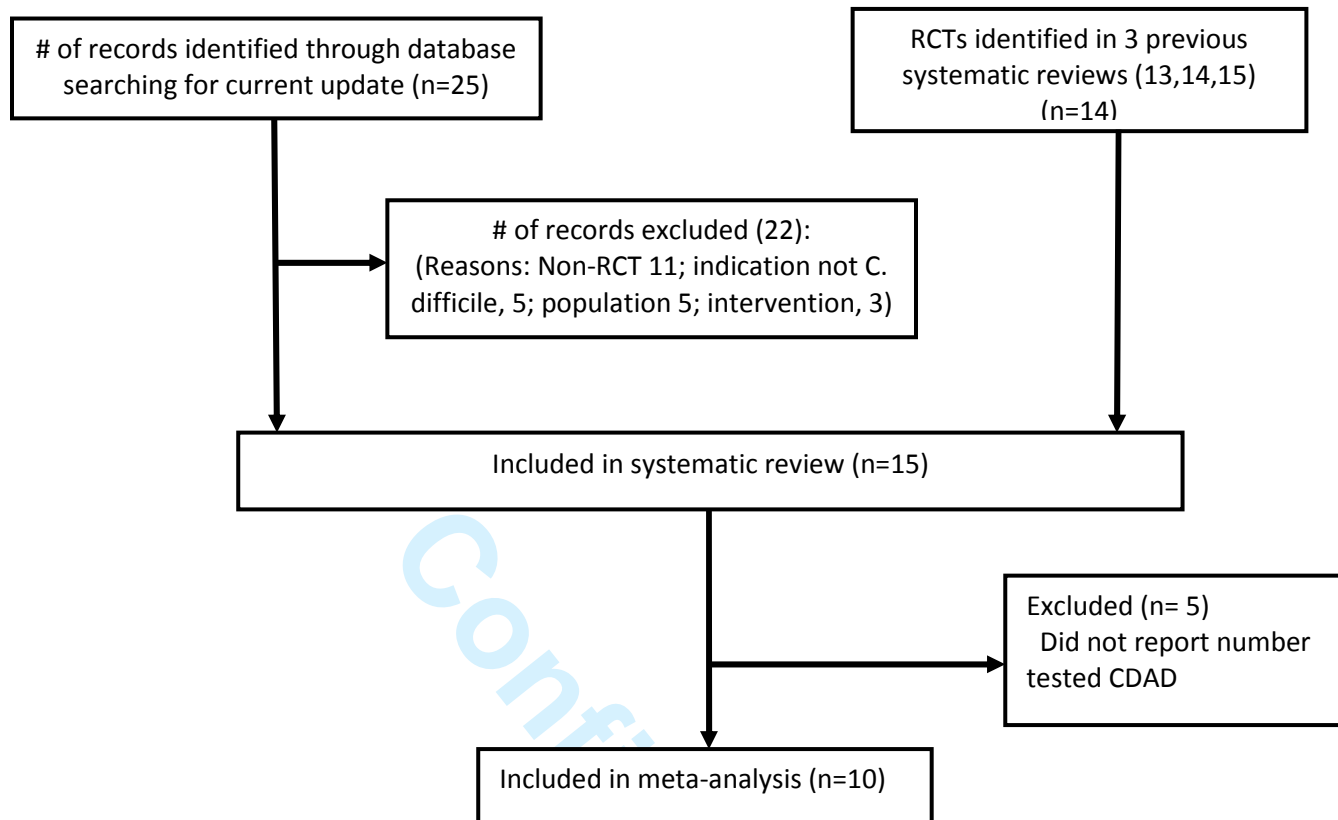

1  
2  
3  
4  
5  
6  
7  
8  
9  
10  
11  
12  
13  
14  
15  
16  
17  
18  
19  
20  
21  
22  
23  
24  
25  
26  
27  
28  
29  
30  
31  
32  
33  
34  
35  
36  
37  
38  
39  
40  
41  
42  
43  
44  
45  
46  
47  
48  
49  
50  
51  
52  
53  
54  
55  
56  
57  
58  
59  
60

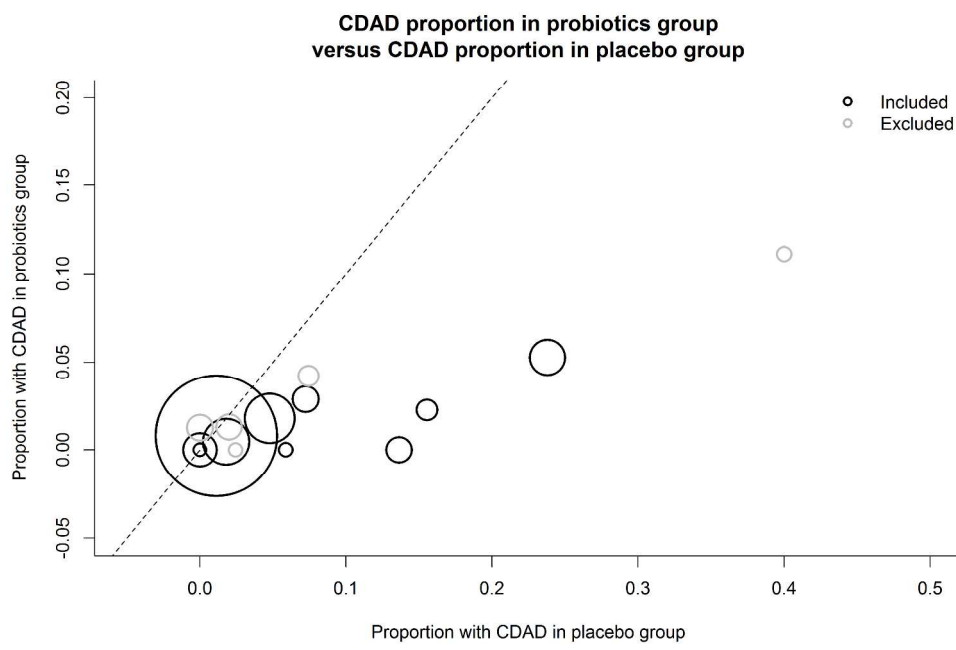

Confidential

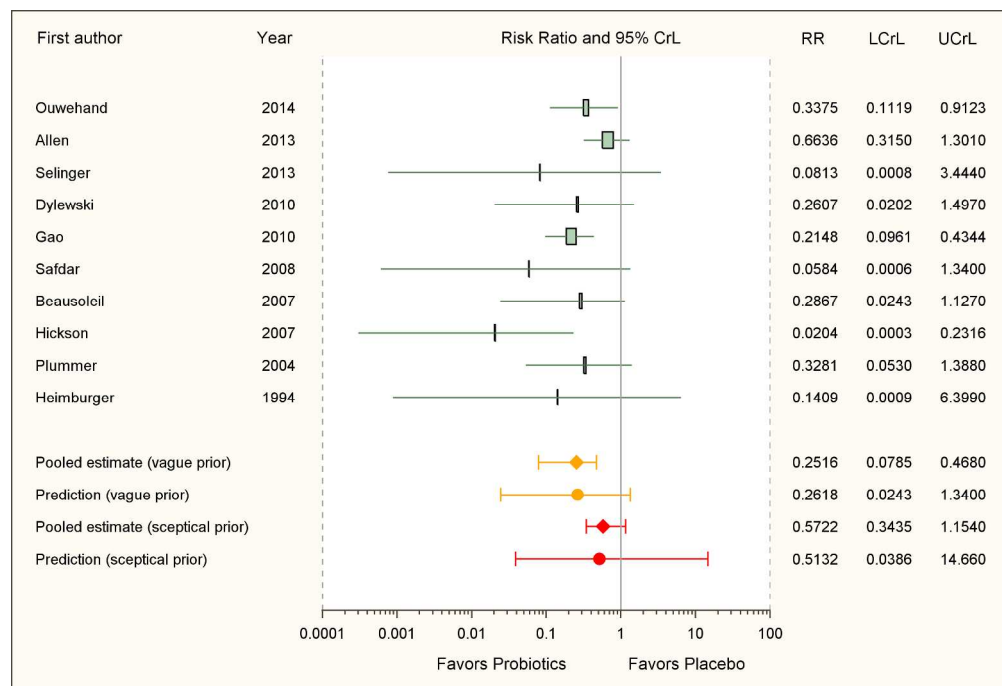

1  
2  
3  
4  
5  
6  
7  
8  
9  
10  
11  
12  
13  
14  
15  
16  
17  
18  
19  
20  
21  
22  
23  
24  
25  
26  
27  
28  
29  
30  
31  
32  
33  
34  
35  
36  
37  
38  
39  
40  
41  
42  
43  
44  
45  
46  
47  
48  
49  
50  
51  
52  
53  
54  
55  
56  
57  
58  
59  
60

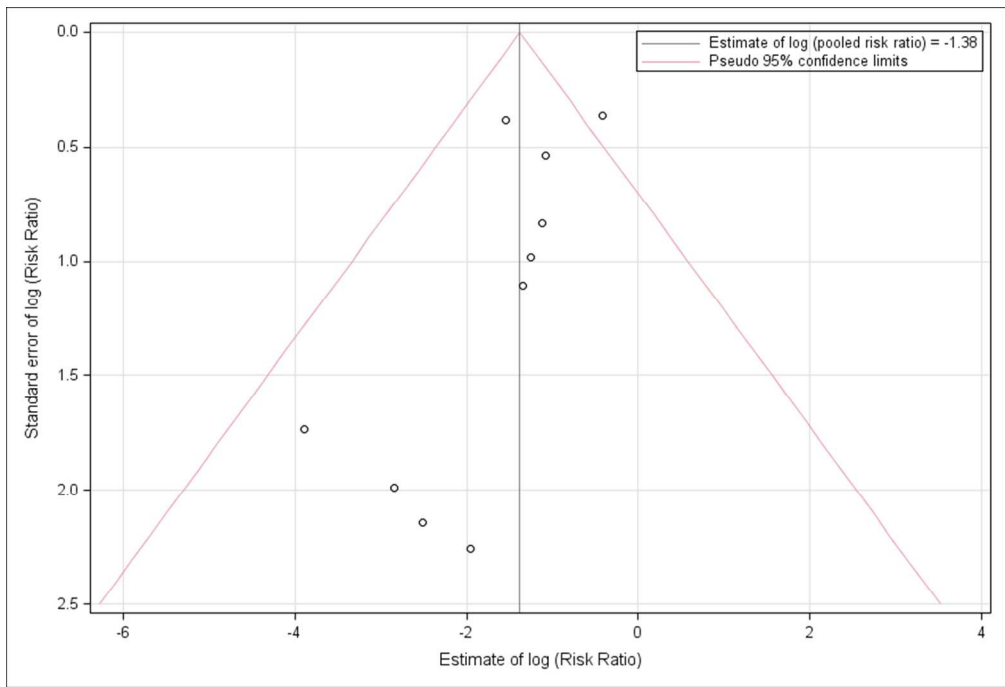

Supplementary Table 1: Results of sensitivity analyses

| Analysis                                                                         | Pooled risk ratio<br>Median (95% credible interval) | 95% Prediction interval | Between-study standard deviation in<br>log risk ratio<br>Median (95% credible interval) |
|----------------------------------------------------------------------------------|-----------------------------------------------------|-------------------------|-----------------------------------------------------------------------------------------|
| Results reported in the main text*                                               | 0.25 (0.08, 0.47)                                   | (0.02, 1.34)            | 0.64 (0.06, 1.75)                                                                       |
| Alternative prior over variance I<br>(Standard Deviation** ~ Uniform (0,3))      | 0.24 (0.07, 0.47)                                   | (0.02, 1.55)            | 0.65 (0.09, 2.17)                                                                       |
| Alternative prior over variance II<br>(Standard Deviation** ~ Cauchy (scale=25)) | 0.24 (0.07, 0.48)                                   | (0.02, 1.77)            | 0.66 (0.06, 2.53)                                                                       |
| Including studies that did not report results of<br>testing                      | 0.28 (0.15, 0.45)                                   | (0.06, 1.01)            | 0.44 (0.05, 1.33)                                                                       |
| Excluding study by Gao et al. <sup>24</sup>                                      | 0.24 (0.06, 0.54)                                   | (0.02, 1.77)            | 0.80 (0.09, 1.87)                                                                       |

\* Between-study standard deviation in log risk ratio ~ U(0,2); \*\* Between study standard-deviation in log risk ratio

1  
2  
3  
4  
5  
6  
7  
8  
9  
10  
11  
12  
13  
14  
15  
16  
17  
18  
19  
20  
21  
22  
23  
24  
25  
26  
27  
28  
29  
30  
31  
32  
33  
34  
35  
36  
37  
38  
39  
40  
41  
42  
43  
44  
45  
46  
47  
48  
49

Supplementary Table 2: PRISMA checklist

| Section/topic             | #  | Checklist item                                                                                                                                                                                                                                                                                              | Reported on page # |
|---------------------------|----|-------------------------------------------------------------------------------------------------------------------------------------------------------------------------------------------------------------------------------------------------------------------------------------------------------------|--------------------|
| <b>TITLE</b>              |    |                                                                                                                                                                                                                                                                                                             |                    |
| Title                     | 1  | Identify the report as a systematic review, meta-analysis, or both.                                                                                                                                                                                                                                         | 1                  |
| <b>ABSTRACT</b>           |    |                                                                                                                                                                                                                                                                                                             |                    |
| Structured summary        | 2  | Provide a structured summary including, as applicable: background; objectives; data sources; study eligibility criteria, participants, and interventions; study appraisal and synthesis methods; results; limitations; conclusions and implications of key findings; systematic review registration number. | 3                  |
| <b>INTRODUCTION</b>       |    |                                                                                                                                                                                                                                                                                                             |                    |
| Rationale                 | 3  | Describe the rationale for the review in the context of what is already known.                                                                                                                                                                                                                              | 5                  |
| Objectives                | 4  | Provide an explicit statement of questions being addressed with reference to participants, interventions, comparisons, outcomes, and study design (PICOS).                                                                                                                                                  | 5                  |
| <b>METHODS</b>            |    |                                                                                                                                                                                                                                                                                                             |                    |
| Protocol and registration | 5  | Indicate if a review protocol exists, if and where it can be accessed (e.g., Web address), and, if available, provide registration information including registration number.                                                                                                                               | No                 |
| Eligibility criteria      | 6  | Specify study characteristics (e.g., PICOS, length of follow-up) and report characteristics (e.g., years considered, language, publication status) used as criteria for eligibility, giving rationale.                                                                                                      | 5,6                |
| Information sources       | 7  | Describe all information sources (e.g., databases with dates of coverage, contact with study authors to identify additional studies) in the search and date last searched.                                                                                                                                  | 5                  |
| Search                    | 8  | Present full electronic search strategy for at least one database, including any limits used, such that it could be repeated.                                                                                                                                                                               | 5                  |
| Study selection           | 9  | State the process for selecting studies (i.e., screening, eligibility, included in systematic review, and, if applicable, included in the meta-analysis).                                                                                                                                                   | 5,6                |
| Data collection process   | 10 | Describe method of data extraction from reports (e.g., piloted forms, independently, in duplicate) and any processes for obtaining and confirming data from investigators.                                                                                                                                  | 6                  |



|                                    |    |                                                                                                                                                                                                                        |     |
|------------------------------------|----|------------------------------------------------------------------------------------------------------------------------------------------------------------------------------------------------------------------------|-----|
| Data items                         | 11 | List and define all variables for which data were sought (e.g., PICOS, funding sources) and any assumptions and simplifications made.                                                                                  | 6   |
| Risk of bias in individual studies | 12 | Describe methods used for assessing risk of bias of individual studies (including specification of whether this was done at the study or outcome level), and how this information is to be used in any data synthesis. | 6   |
| Summary measures                   | 13 | State the principal summary measures (e.g., risk ratio, difference in means).                                                                                                                                          | 6   |
| Synthesis of results               | 14 | Describe the methods of handling data and combining results of studies, if done, including measures of consistency (e.g., $I^2$ ) for each meta-analysis.                                                              | 6,7 |

Confidential
